# Supplementary material
Source: publisher figshare collection journal article supplement (https://springernature.figshare.com/ndownloader/files/21835263)
Supplement: Supplementary file 1 [file 21835263]

| Germany |  | Population Responses |
|---------|--|----------------------|
| Total   |  | 1102<br>100.00%      |

**Table 1**  
 What is your gender?  
 Base: All Respondents

|        | Population Responses |
|--------|----------------------|
| Total  | 1102<br>100.00%      |
| Male   | 554<br>50.30%        |
| Female | 548<br>49.70%        |
| Other  | 0<br>-               |
| SUM    | 1102<br>100.00%      |

**Table 2**

What is your age?

Base: All Respondents

|              | Population<br>Responses |
|--------------|-------------------------|
| Total        | 1102<br>100.00%         |
| 18-24 (21)   | 144<br>13.10%           |
| 25-34 (29.5) | 211<br>19.10%           |
| 35-44 (39.5) | 248<br>22.50%           |
| 45-54 (49.5) | 266<br>24.10%           |
| 55-65 (60)   | 233<br>21.10%           |
| >65 (65)     | 0<br>-                  |

**Table 3**

Q1. Which fragranced products are you exposed to, at least once a week, from your own use?

Base: All Respondents

|                                                                                               | Population<br>Responses |
|-----------------------------------------------------------------------------------------------|-------------------------|
| Total                                                                                         | 1102<br>100.00%         |
| Air fresheners and deodorizers (e.g., sprays, solids, oils, disks)                            | 507<br>46.00%           |
| Personal care products (e.g., soaps, hand sanitizer, lotions, deodorant, sunscreen, shampoos) | 991<br>89.90%           |
| Cleaning supplies (e.g., all-purpose cleaners, disinfectants, and dishwashing soap)           | 859<br>77.90%           |
| Laundry products (e.g., detergents, fabric softeners, dryer sheets)                           | 894<br>81.10%           |
| Household products (e.g., scented candles, toilet paper, trash bags, baby products)           | 793<br>72.00%           |
| Fragrance (e.g., perfume, cologne, after-shave)                                               | 809<br>73.40%           |
| Other                                                                                         | 50<br>4.50%             |
| None                                                                                          | 34<br>3.10%             |
| SUM                                                                                           | 4937<br>448.00%         |

**Table 4**

Q1a. Which fragranced products are you exposed to, at least once a week, from others' use?

Base: All Respondents

|                                                                                               | Population<br>Responses |
|-----------------------------------------------------------------------------------------------|-------------------------|
| Total                                                                                         | 1102<br>100.00%         |
| Air fresheners and deodorizers (e.g., sprays, solids, oils, disks)                            | 391<br>35.50%           |
| Personal care products (e.g., soaps, hand sanitizer, lotions, deodorant, sunscreen, shampoos) | 608<br>55.20%           |
| Cleaning supplies (e.g., all-purpose cleaners, disinfectants, and dishwashing soap)           | 488<br>44.30%           |
| Laundry products (e.g., detergents, fabric softeners, dryer sheets)                           | 462<br>41.90%           |
| Household products (e.g., scented candles, toilet paper, trash bags, baby products)           | 449<br>40.70%           |
| Fragrance (e.g., perfume, cologne, after-shave)                                               | 717<br>65.10%           |
| Other                                                                                         | 34<br>3.10%             |
| None                                                                                          | 197<br>17.90%           |
| SUM                                                                                           | 3346<br>303.60%         |

**Table 5**

Q2. Do you experience any health problems when exposed to air fresheners or deodorizers?

Base: All Respondents

|                     | Population Responses |
|---------------------|----------------------|
| Total               | 1102<br>100.00%      |
| Yes                 | 104<br>9.40%         |
| No                  | 850<br>77.10%        |
| Don't know/not sure | 147<br>13.30%        |
| Decline to answer   | 1<br>0.10%           |
| SUM                 | 1102<br>100.00%      |

**Table 6**

BA. Which of the following health problems do you (...)?

Base: Respondents who experienced below health problems when exposed to air fresheners or deodorizers

|                                                                                              | Population<br>Responses |
|----------------------------------------------------------------------------------------------|-------------------------|
| Total                                                                                        | 104<br>100.00%          |
| Migraine headaches                                                                           | 21<br>20.20%            |
| Asthma attacks                                                                               | 17<br>16.30%            |
| Neurological problems (e.g., dizziness, seizures, head pain, fainting, loss of coordination) | 25<br>24.00%            |
| Respiratory problems (e.g., difficulty breathing, coughing, shortness of breath)             | 47<br>45.20%            |
| Skin problems (e.g., rashes, hives, red skin, tingling skin, dermatitis)                     | 35<br>33.70%            |
| Cognitive problems (e.g., difficulties thinking, concentrating, or remembering)              | 12<br>11.50%            |
| Mucosal symptoms (e.g., watery or red eyes, nasal congestion, sneezing)                      | 32<br>30.80%            |
| Immune system problems (e.g., swollen lymph glands, fever, fatigue)                          | 7<br>6.70%              |
| Gastrointestinal problems (e.g., nausea, bloating, cramping, diarrhea)                       | 21<br>20.20%            |
| Cardiovascular problems (e.g., fast or irregular heartbeat, jitteriness, chest discomfort)   | 9<br>8.70%              |
| Musculoskeletal problems (e.g., muscle or joint pain, cramps, weakness)                      | 7<br>6.70%              |
| Other                                                                                        | 2<br>1.90%              |
| SUM                                                                                          | 235<br>226.00%          |

**Table 7**

Q3. Do you experience any health problems from the scent of laundry products coming from a dryer vent?

Base: All Respondents

|                     | Population Responses |
|---------------------|----------------------|
| Total               | 1102<br>100.00%      |
| Yes                 | 75<br>6.80%          |
| No                  | 917<br>83.20%        |
| Don't know/not sure | 108<br>9.80%         |
| Decline to answer   | 2<br>0.20%           |
| SUM                 | 1102<br>100.00%      |

**Table 8**

BA. Which of the following health problems do you (...)?

Base: Respondents who experienced below health problems from the scent of laundry products coming from a dryer vent

|                                                                                              | Population Responses |
|----------------------------------------------------------------------------------------------|----------------------|
| Total                                                                                        | 75<br>100.00%        |
| Migraine headaches                                                                           | 10<br>13.30%         |
| Asthma attacks                                                                               | 11<br>14.70%         |
| Neurological problems (e.g., dizziness, seizures, head pain, fainting, loss of coordination) | 10<br>13.30%         |
| Respiratory problems (e.g., difficulty breathing, coughing, shortness of breath)             | 18<br>24.00%         |
| Skin problems (e.g., rashes, hives, red skin, tingling skin, dermatitis)                     | 23<br>30.70%         |
| Cognitive problems (e.g., difficulties thinking, concentrating, or remembering)              | 12<br>16.00%         |
| Mucosal symptoms (e.g., watery or red eyes, nasal congestion, sneezing)                      | 17<br>22.70%         |
| Immune system problems (e.g., swollen lymph glands, fever, fatigue)                          | 9<br>12.00%          |
| Gastrointestinal problems (e.g., nausea, bloating, cramping, diarrhea)                       | 11<br>14.70%         |
| Cardiovascular problems (e.g., fast or irregular heartbeat, jitteriness, chest discomfort)   | 9<br>12.00%          |
| Musculoskeletal problems (e.g., muscle or joint pain, cramps, weakness)                      | 8<br>10.70%          |
| Other                                                                                        | 3<br>4.00%           |
| SUM                                                                                          | 141<br>188.00%       |



**Table 9**

Q4. Do you experience any health problems from  
being in a room after it has been cleaned with scented products?  
Base: All Respondents

|                     | Population<br>Responses |
|---------------------|-------------------------|
| Total               | 1102<br>100.00%         |
| Yes                 | 131<br>11.90%           |
| No                  | 835<br>75.80%           |
| Don't know/not sure | 132<br>12.00%           |
| Decline to answer   | 4<br>0.40%              |
| SUM                 | 1102<br>100.00%         |

**Table 10**

BA. Which of the following health problems do you (...)?

Base: Respondents who experienced below health problems from being in a room after it has been cleaned with scented products

|                                                                                              | Population Responses |
|----------------------------------------------------------------------------------------------|----------------------|
| Total                                                                                        | 131<br>100.00%       |
| Migraine headaches                                                                           | 23<br>17.60%         |
| Asthma attacks                                                                               | 16<br>12.20%         |
| Neurological problems (e.g., dizziness, seizures, head pain, fainting, loss of coordination) | 29<br>22.10%         |
| Respiratory problems (e.g., difficulty breathing, coughing, shortness of breath)             | 70<br>53.40%         |
| Skin problems (e.g., rashes, hives, red skin, tingling skin, dermatitis)                     | 26<br>19.80%         |
| Cognitive problems (e.g., difficulties thinking, concentrating, or remembering)              | 13<br>9.90%          |
| Mucosal symptoms (e.g., watery or red eyes, nasal congestion, sneezing)                      | 43<br>32.80%         |
| Immune system problems (e.g., swollen lymph glands, fever, fatigue)                          | 14<br>10.70%         |
| Gastrointestinal problems (e.g., nausea, bloating, cramping, diarrhea)                       | 14<br>10.70%         |
| Cardiovascular problems (e.g., fast or irregular heartbeat, jitteriness, chest discomfort)   | 14<br>10.70%         |
| Musculoskeletal problems (e.g., muscle or joint pain, cramps, weakness)                      | 10<br>7.60%          |
| Other                                                                                        | 1<br>0.80%           |
| SUM                                                                                          | 273<br>208.40%       |

**Table 11**

Q5. Do you experience any health problems from being near someone who is wearing a fragranced product?  
Base: All Respondents

|                     | Population Responses |
|---------------------|----------------------|
| Total               | 1102<br>100.00%      |
| Yes                 | 112<br>10.20%        |
| No                  | 883<br>80.10%        |
| Don't know/not sure | 106<br>9.60%         |
| Decline to answer   | 1<br>0.10%           |
| SUM                 | 1102<br>100.00%      |

**Table 12**

BA. Which of the following health problems do you (...)?

Base: Respondents who experienced below health problems from being near someone who is wearing a fragranced product

|                                                                                              | Population Responses |
|----------------------------------------------------------------------------------------------|----------------------|
| Total                                                                                        | 112<br>100.00%       |
| Migraine headaches                                                                           | 19<br>17.00%         |
| Asthma attacks                                                                               | 18<br>16.10%         |
| Neurological problems (e.g., dizziness, seizures, head pain, fainting, loss of coordination) | 26<br>23.20%         |
| Respiratory problems (e.g., difficulty breathing, coughing, shortness of breath)             | 51<br>45.50%         |
| Skin problems (e.g., rashes, hives, red skin, tingling skin, dermatitis)                     | 20<br>17.90%         |
| Cognitive problems (e.g., difficulties thinking, concentrating, or remembering)              | 18<br>16.10%         |
| Mucosal symptoms (e.g., watery or red eyes, nasal congestion, sneezing)                      | 37<br>33.00%         |
| Immune system problems (e.g., swollen lymph glands, fever, fatigue)                          | 10<br>8.90%          |
| Gastrointestinal problems (e.g., nausea, bloating, cramping, diarrhea)                       | 13<br>11.60%         |
| Cardiovascular problems (e.g., fast or irregular heartbeat, jitteriness, chest discomfort)   | 14<br>12.50%         |
| Musculoskeletal problems (e.g., muscle or joint pain, cramps, weakness)                      | 9<br>8.00%           |
| Other                                                                                        | 4<br>3.60%           |
| SUM                                                                                          | 239<br>213.40%       |

**Table 13**

Q5. In general, do you experience any health problems from exposure to any type of fragranced product?

Base: All Respondents

|                     | Population<br>Responses |
|---------------------|-------------------------|
| Total               | 1102<br>100.00%         |
| Yes                 | 112<br>10.20%           |
| No                  | 880<br>79.90%           |
| Don't know/not sure | 107<br>9.70%            |
| Decline to answer   | 3<br>0.30%              |
| SUM                 | 1102<br>100.00%         |

**Table 14**

BA. Which of the following health problems do you (...)?

Base: Respondents who experienced below health problems from exposure to any type of fragranced product

|                                                                                              | Population<br>Responses |
|----------------------------------------------------------------------------------------------|-------------------------|
| Total                                                                                        | 112<br>100.00%          |
| Migraine headaches                                                                           | 27<br>24.10%            |
| Asthma attacks                                                                               | 15<br>13.40%            |
| Neurological problems (e.g., dizziness, seizures, head pain, fainting, loss of coordination) | 24<br>21.40%            |
| Respiratory problems (e.g., difficulty breathing, coughing, shortness of breath)             | 54<br>48.20%            |
| Skin problems (e.g., rashes, hives, red skin, tingling skin, dermatitis)                     | 33<br>29.50%            |
| Cognitive problems (e.g., difficulties thinking, concentrating, or remembering)              | 17<br>15.20%            |
| Mucosal symptoms (e.g., watery or red eyes, nasal congestion, sneezing)                      | 39<br>34.80%            |
| Immune system problems (e.g., swollen lymph glands, fever, fatigue)                          | 17<br>15.20%            |
| Gastrointestinal problems (e.g., nausea, bloating, cramping, diarrhea)                       | 17<br>15.20%            |
| Cardiovascular problems (e.g., fast or irregular heartbeat, jitteriness, chest discomfort)   | 15<br>13.40%            |
| Musculoskeletal problems (e.g., muscle or joint pain, cramps, weakness)                      | 12<br>10.70%            |
| Other                                                                                        | 1<br>0.90%              |
| SUM                                                                                          | 271<br>242.00%          |

**Table 15**

B2. Do any of these health problems ... affect your participation in society? (disability question)

Base: All Respondents

|                     | Population<br>Responses |
|---------------------|-------------------------|
| Total               | 219<br>100.00%          |
| Yes                 | 74<br>33.80%            |
| No                  | 101<br>46.10%           |
| Don't know/not sure | 42<br>19.20%            |
| Decline to answer   | 2<br>0.90%              |
| SUM                 | 219<br>100.00%          |

**Table 16**

Have you ever been unable or reluctant to use the toilets in a public place,  
because of the presence of an air freshener, deodorizer, or scented product?

Base: All Respondents

|                   | Population<br>Responses |
|-------------------|-------------------------|
| Total             | 1102<br>100.00%         |
| Yes               | 176<br>16.00%           |
| No                | 848<br>77.00%           |
| Neutral/not sure  | 77<br>7.00%             |
| Decline to answer | 1<br>0.10%              |
| SUM               | 1102<br>100.00%         |



**Table 17**

If you enter a business, and you smell air fresheners or some fragranced product,  
do you want to leave as quickly as possible?

Base: All Respondents

|                   | Population Responses |
|-------------------|----------------------|
| Total             | 1102<br>100.00%      |
| Yes               | 156<br>14.20%        |
| No                | 821<br>74.50%        |
| Neutral/not sure  | 123<br>11.20%        |
| Decline to answer | 2<br>0.20%           |
| SUM               | 1102<br>100.00%      |

**Table 18**

Have you ever been unable or reluctant to wash your hands with soap in a public place,  
because you know or suspect that the soap is fragranced?

Base: All Respondents

|                   | Population<br>Responses |
|-------------------|-------------------------|
| Total             | 1102<br>100.00%         |
| Yes               | 92<br>8.30%             |
| No                | 927<br>84.10%           |
| Neutral/not sure  | 80<br>7.30%             |
| Decline to answer | 3<br>0.30%              |
| SUM               | 1102<br>100.00%         |

**Table 19**

**Have you ever been prevented from going to some place**

because you would be exposed to a fragrance product that would make you sick?

Base: All Respondents

|                     | Population<br>Responses |
|---------------------|-------------------------|
| Total               | 1102<br>100.00%         |
| Yes                 | 198<br>18.00%           |
| No                  | 753<br>68.30%           |
| Don't know/not sure | 146<br>13.20%           |
| Decline to answer   | 5<br>0.50%              |
| SUM                 | 1102<br>100.00%         |

**Table 20**

Has any exposure to fragranced products in your work environment caused you to become sick, lose work days, or lose a job?

Base: All Respondents

|                     | Population Responses |
|---------------------|----------------------|
| Total               | 1102<br>100.00%      |
| Yes                 | 61<br>5.50%          |
| No                  | 958<br>86.90%        |
| Don't know/not sure | 76<br>6.90%          |
| Decline to answer   | 7<br>0.60%           |
| SUM                 | 1102<br>100.00%      |

**Table 21**  
Would you be supportive of a fragrance-free policy in the workplace?  
Base: All Respondents

|                   | Population<br>Responses |
|-------------------|-------------------------|
| Total             | 1102<br>100.00%         |
| Yes               | 366<br>33.20%           |
| No                | 337<br>30.60%           |
| Neutral/not sure  | 389<br>35.30%           |
| Decline to answer | 10<br>0.90%             |
| SUM               | 1102<br>100.00%         |

**Table 22**

Would you prefer that health care facilities and health care professionals be fragrance-free?

Base: All Respondents

|                   | Population<br>Responses |
|-------------------|-------------------------|
| Total             | 1102<br>100.00%         |
| Yes               | 511<br>46.40%           |
| No                | 328<br>29.80%           |
| Neutral/not sure  | 258<br>23.40%           |
| Decline to answer | 5<br>0.50%              |
| SUM               | 1102<br>100.00%         |

**Table 23**

Flying On An Airplane That Pumped / Did Not Pump Scented Air Throughout The Passenger Cabin,  
Which Would You Choose?

Base: All Respondents

|                              | Population<br>Responses |
|------------------------------|-------------------------|
| Total                        | 1102<br>100.00%         |
| Airplane with scented air    | 173<br>15.70%           |
| Airplane without scented air | 628<br>57.00%           |
| Neutral/not sure             | 294<br>26.70%           |
| Decline to answer            | 7<br>0.60%              |
| SUM                          | 1102<br>100.00%         |

**Table 24**

Staying In A Hotel With / Without Fragranced Air, Which Would You Choose?

Base: All Respondents

|                              | Population Responses |
|------------------------------|----------------------|
| Total                        | 1102                 |
|                              | 100.00%              |
| Hotel with fragranced air    | 200                  |
|                              | 18.10%               |
| Hotel without fragranced air | 644                  |
|                              | 58.40%               |
| Neutral/not sure             | 255                  |
|                              | 23.10%               |
| Decline to answer            | 3                    |
|                              | 0.30%                |
| SUM                          | 1102                 |
|                              | 100.00%              |



**Table 25**

Who Answer "Yes" To One Or More Of These Options For Q1.

Base: All Respondents

|                                                                                              | Population<br>Responses |
|----------------------------------------------------------------------------------------------|-------------------------|
| Total                                                                                        | 1102<br>100.00%         |
| Yes (Net)                                                                                    | 1068<br>96.90%          |
| Air fresheners and deodorizers (e.g., sprays, solids, oils, disks)                           | 507<br>46.00%           |
| Personal care products (e.g., soaps, hand sanitizer, lotions, deodorant, sunscreen, shampoo) | 991<br>89.90%           |
| Cleaning supplies (e.g., all-purpose cleaners, disinfectants, and dishwashing soap)          | 859<br>77.90%           |
| Laundry products (e.g., detergents, fabric softeners, dryer sheets)                          | 894<br>81.10%           |
| Household products (e.g., scented candles, toilet paper, trash bags, baby products)          | 793<br>72.00%           |
| Fragrance (e.g., perfume, cologne, after-shave)                                              | 809<br>73.40%           |
| Other                                                                                        | 50<br>4.50%             |
| None                                                                                         | 34<br>3.10%             |
| SUM                                                                                          | 4937<br>448.00%         |

**Table 26**

Who Answer "Yes" To One Or More Of These Options For Q1A.

Base: All Respondents

|                                                                                              | Population<br>Responses |
|----------------------------------------------------------------------------------------------|-------------------------|
| Total                                                                                        | 1102<br>100.00%         |
| Yes (Net)                                                                                    | 905<br>82.10%           |
| Air fresheners and deodorizers (e.g., sprays, solids, oils, disks)                           | 391<br>35.50%           |
| Personal care products (e.g., soaps, hand sanitizer, lotions, deodorant, sunscreen, shampoo) | 608<br>55.20%           |
| Cleaning supplies (e.g., all-purpose cleaners, disinfectants, and dishwashing soap)          | 488<br>44.30%           |
| Laundry products (e.g., detergents, fabric softeners, dryer sheets)                          | 462<br>41.90%           |
| Household products (e.g., scented candles, toilet paper, trash bags, baby products)          | 449<br>40.70%           |
| Fragrance (e.g., perfume, cologne, after-shave)                                              | 717<br>65.10%           |
| Other                                                                                        | 34<br>3.10%             |
| None                                                                                         | 197<br>17.90%           |
| SUM                                                                                          | 3346<br>303.60%         |

**Table 27**

Q1/Q1a. Who Answer "Yes" To One Or More Of These Options For Q1/Q1A

Base: All Respondents

|                                                                                              | Population<br>Responses |
|----------------------------------------------------------------------------------------------|-------------------------|
| Total                                                                                        | 1102<br>100.00%         |
| Yes (Net)                                                                                    | 1076<br>97.60%          |
| Air fresheners and deodorizers (e.g., sprays, solids, oils, disks)                           | 615<br>55.80%           |
| Personal care products (e.g., soaps, hand sanitizer, lotions, deodorant, sunscreen, shampoo) | 1008<br>91.50%          |
| Cleaning supplies (e.g., all-purpose cleaners, disinfectants, and dishwashing soap)          | 923<br>83.80%           |
| Laundry products (e.g., detergents, fabric softeners, dryer sheets)                          | 941<br>85.40%           |
| Household products (e.g., scented candles, toilet paper, trash bags, baby products)          | 849<br>77.00%           |
| Fragrance (e.g., perfume, cologne, after-shave)                                              | 917<br>83.20%           |
| Other                                                                                        | 62<br>5.60%             |
| None                                                                                         | 205<br>18.60%           |
| SUM                                                                                          | 5520<br>500.90%         |

**Table 28**

"Yes" To One Or More Of These Questions: Q2/Q3/Q4/Q5/Q6 (fragrance sensitive individuals).

Base: All Respondents

|       | Population<br>Responses |
|-------|-------------------------|
| Total | 1102<br>100.00%         |
| Yes   | 219<br>19.90%           |

**Table 29**

People who answer "Yes" to each type of health problem under BA

Base: Fragrance Sensitive Individuals

|                                                                                              | Population Responses |
|----------------------------------------------------------------------------------------------|----------------------|
| Total                                                                                        | 1102<br>100.00%      |
| Migraine headaches                                                                           | 55<br>25.1%          |
| Asthma attacks                                                                               | 37<br>16.9%          |
| Neurological problems (e.g., dizziness, seizures, head pain, fainting, loss of coordination) | 60<br>27.4%          |
| Respiratory problems (e.g., difficulty breathing, coughing, shortness of breath)             | 121<br>55.3%         |
| Skin problems (e.g., rashes, hives, red skin, tingling skin, dermatitis)                     | 70<br>32.0%          |
| Cognitive problems (e.g., difficulties thinking, concentrating, or remembering)              | 41<br>18.7%          |
| Mucosal symptoms (e.g., watery or red eyes, nasal congestion, sneezing)                      | 78<br>35.6%          |
| Immune system problems (e.g., swollen lymph glands, fever, fatigue)                          | 29<br>13.2%          |
| Gastrointestinal problems (e.g., nausea, bloating, cramping, diarrhea)                       | 48<br>21.9%          |
| Cardiovascular problems (e.g., fast or irregular heartbeat, jitteriness, chest discomfort)   | 32<br>14.6%          |
| Musculoskeletal problems (e.g., muscle or joint pain, cramps, weakness)                      | 21<br>9.6%           |
| Other                                                                                        | 7<br>3.2%            |

**Table 30**

Demographics

Base: All Germany Respondents

|               | Population<br>Responses |
|---------------|-------------------------|
| Total         | 1102<br>100.00%         |
| Male/Female   |                         |
| All Males     | 554<br>50.30%           |
| All Females   | 548<br>49.70%           |
| Gender vs Age |                         |
| Male 18-24    | 62<br>5.60%             |
| Male 25-34    | 88<br>8.00%             |
| Male 35-44    | 119<br>10.80%           |
| Male 45-54    | 141<br>12.80%           |
| Male 55-65    | 144<br>13.10%           |
| Female 18-24  | 82<br>7.40%             |
| Female 25-34  | 123<br>11.20%           |
| Female 35-44  | 129<br>11.70%           |
| Female 45-54  | 125<br>11.30%           |
| Female 55-65  | 89<br>8.10%             |

**Table 31**

Demographics.

Base: Fragrance sensitive individuals (Yes to one or more of these questions: Q2, Q3, Q4, Q5, Q6)

|               | Population<br>Responses |
|---------------|-------------------------|
| Total         | 219<br>100.00%          |
| Male/Female   |                         |
| All Males     | 109<br>49.80%           |
| All Females   | 110<br>50.20%           |
| Gender vs Age |                         |
| Male 18-24    | 23<br>10.50%            |
| Male 25-34    | 30<br>13.70%            |
| Male 35-44    | 17<br>7.80%             |
| Male 45-54    | 20<br>9.10%             |
| Male 55-65    | 19<br>8.70%             |
| Female 18-24  | 15<br>6.80%             |
| Female 25-34  | 31<br>14.20%            |
| Female 35-44  | 28<br>12.80%            |
| Female 45-54  | 23<br>10.50%            |
| Female 55-65  | 13<br>5.90%             |
